# Supplementary material for: The heat-promoted metal–support interaction of a PtCu/SiO 2 carbon-free catalyst for the methanol oxidation and oxygen reduction reactions
Source: Royal Society of Chemistry journal article supplement (doi:10.1039/d3su00193h), 2023-01-01
Supplement: d3su00193h1.pdf [file d3su00193h1.pdf]

## Supporting Information

### **The heat-promoted metal-support interaction of PtCu/SiO<sub>2</sub> carbon-free catalyst for methanol oxidation and oxygen reduction reactions**

Quanqing Zhao,<sup>a</sup> Han Zhi,<sup>b</sup> Liu Yang,<sup>a</sup> Feng Xu<sup>a,b\*</sup>

<sup>a</sup>*Collage of Materials Science and Technology, Fuzhou University, Fuzhou, 350108, China.*

<sup>b</sup>*School of Advanced Manufacturing, Fuzhou University, Jinjiang, 362200, China.*

*E-mail: xufeng.mater@fzu.edu.cn*

## 1. Chemicals

Ethanol, ammonium hydroxide (28 wt.%), ethylsilicate, Chloroplatinic acid hexahydrate [ $\text{H}_2\text{PtCl}_6 \cdot 6\text{H}_2\text{O}$ ], copper nitrate hydrate [ $\text{Cu}(\text{NO}_3)_2 \cdot 3\text{H}_2\text{O}$ ] and ethylene glycol (EG) were of analytical reagent (A.R.) grade and purchased from Sinopharm Chemical Reagent Co., Ltd. Commercial 20 wt.% Pt/C was self-made in lab. All chemicals were used as received. Deionized water (DI water, Millipore, 18.2 M $\Omega$  at 25 °C) was used in all processes.

## 2. Characterizations

The morphology was observed by scanning electron microscope (SEM · SUPRA 55, Carl Zeiss), and the structure was identified by transmission electron microscope (TEM, Titan G2 60-300 with image corrector). The X-ray diffraction (XRD, Ultima III, Rigaku) was performed to identify the crystal structure. FTIR was tested using AVATAR360. X-ray photoelectron spectroscopy (XPS) was carried out on ESCALAB 250 (Thermo Scientific) to probe the surface chemical information of catalysts.

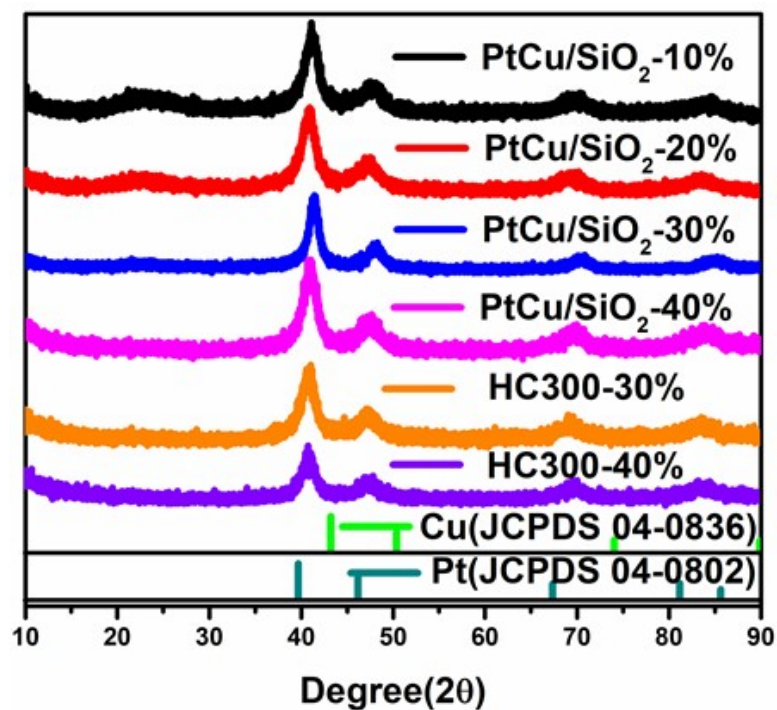

Figure S1. XRD pattern of PtCu/SiO<sub>2</sub> with 10, 20, 30, 40 wt.% Pt loading (PtCu/SiO<sub>2</sub>-10%, PtCu/SiO<sub>2</sub>-20%, PtCu/SiO<sub>2</sub>-30% and PtCu/SiO<sub>2</sub>-40%), HC300-30% and HC300-40% represent the catalysts PtCu/SiO<sub>2</sub>-30% and PtCu/SiO<sub>2</sub>-40% calcined at 300 °C.

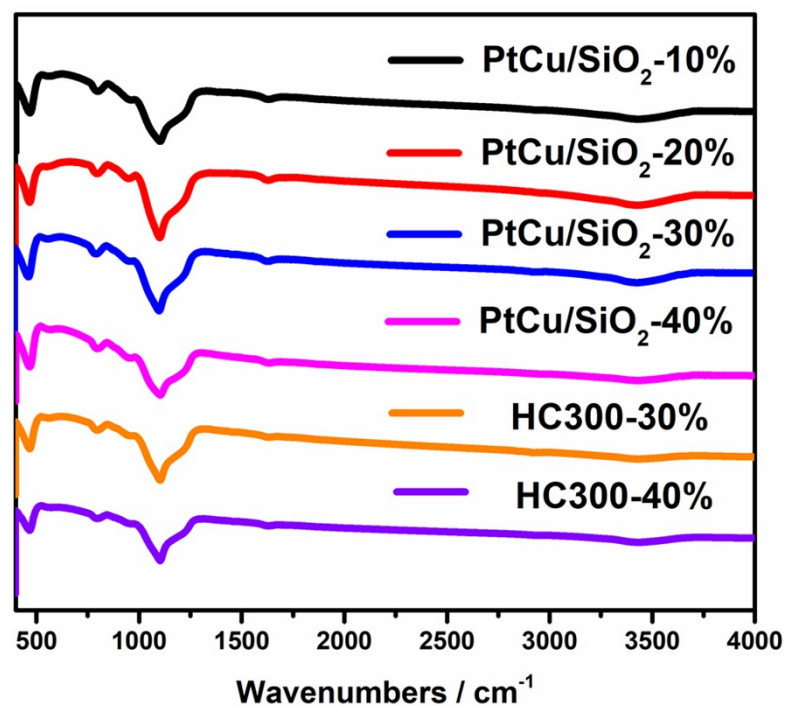

Figure S2. FTIR spectra of PtCu/SiO<sub>2</sub> with different Pt loading (PtCu/SiO<sub>2</sub>-10%, PtCu/SiO<sub>2</sub>-20%, PtCu/SiO<sub>2</sub>-30% and PtCu/SiO<sub>2</sub>-40%), HC300-30%, and HC300-40%.

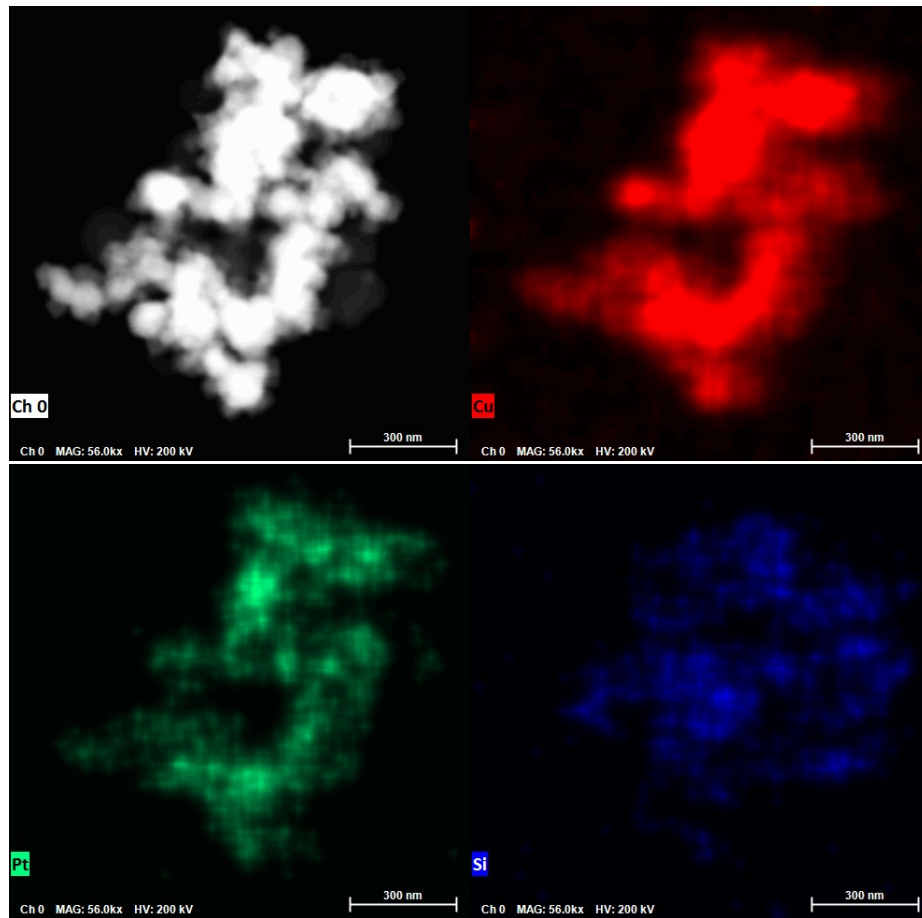

Figure S3 The elemental mapping of HC300-40%.

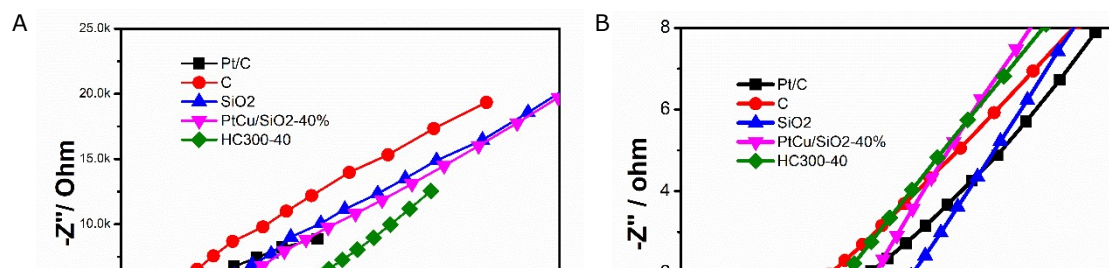

Figure S4 A, the Nyquist plots of carbon (XC-72), SiO<sub>2</sub> nanospheres, PtCu/SiO<sub>2</sub>-40%, and HC300-40%; B, the plots from 4~7 Ohm of horizontal coordinate.

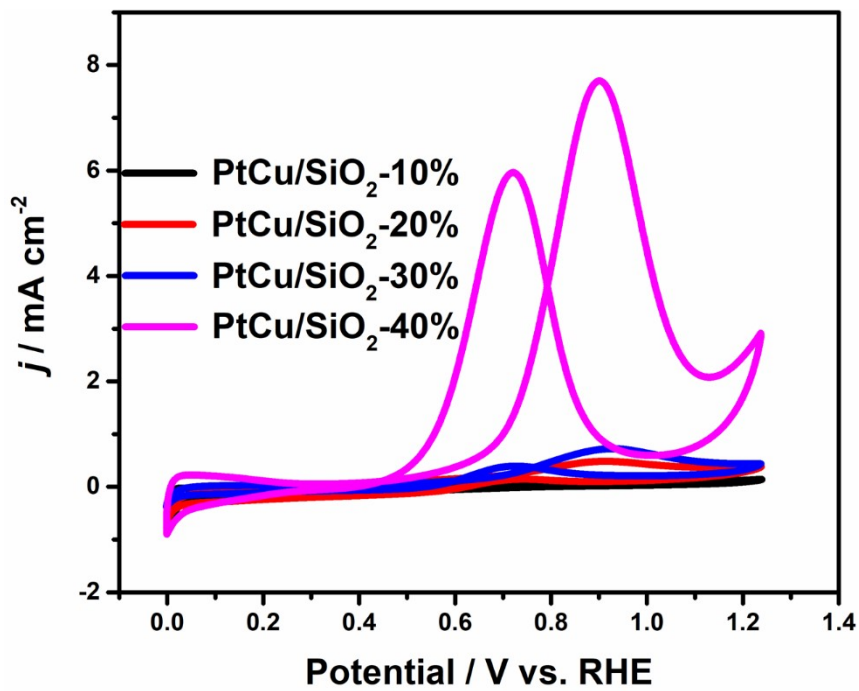

Figure S5. MOR activities of PtCu/SiO<sub>2</sub>-10%, PtCu/SiO<sub>2</sub>-20%, PtCu/SiO<sub>2</sub>-30%, and PtCu/SiO<sub>2</sub>-40%.

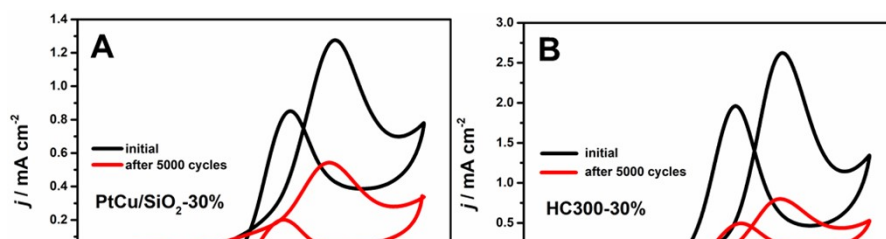

Figure S6. MOR durability of PtCu/SiO<sub>2</sub>-30% (A), HC300-30% (B), PtCu/SiO<sub>2</sub>-40% (C), HC300-40% (D), and Pt/C (E).



**Table S1 The composition detected by ICP-AES**

| Sample                     | SiO <sub>2</sub> (wt %) | Pt (wt %) | Cu (wt %) | Pt:Cu (at %) |
|----------------------------|-------------------------|-----------|-----------|--------------|
| PtCu/SiO <sub>2</sub> -10% | 88.1                    | 8.1       | 3.7       | 0.72         |
| PtCu/SiO <sub>2</sub> -20% | 60                      | 32        | 7.9       | 1.33         |
| PtCu/SiO <sub>2</sub> -30% | 45.2                    | 38.9      | 15.8      | 0.81         |
| PtCu/SiO <sub>2</sub> -40% | 29                      | 58        | 13        | 1.46         |
| HC300-30%                  | 37.3                    | 50        | 12        | 1.36         |
| HC300-40%                  | 43                      | 46.6      | 10.4      | 1.47         |

**Table S2 The binding energy of all catalysts detected by XPS**

| Sample                     | Si 2p (eV) | Cu 2p <sub>3/2</sub> (eV) | Cu 2p <sub>1/2</sub> (eV) | Pt 4f <sub>7/2</sub> (eV) | Pt 4f <sub>5/2</sub> (eV) |
|----------------------------|------------|---------------------------|---------------------------|---------------------------|---------------------------|
| PtCu/SiO <sub>2</sub> -30% | 103.68     | 932.08                    | 951.68                    | 71.28                     | 74.48                     |
| HC300-30%                  | 103.48     | 932.28                    | 951.78                    | 71.58                     | 74.78                     |
| PtCu/SiO <sub>2</sub> -40% | 103.68     | 931.88                    | 951.68                    | 71.38                     | 74.58                     |
| HC300-40%                  | 103.48     | 932.48                    | 952.18                    | 71.68                     | 74.88                     |

| Sample                     | ECSA ( $\text{m}^2/\text{g}_{\text{Pt}}$ ) | MA ( $\text{A mg}_{\text{Pt}}^{-1}$ ) | SA ( $\text{mA cm}^{-2}$ ) | $I_f/I_b$ |
|----------------------------|--------------------------------------------|---------------------------------------|----------------------------|-----------|
| PtCu/SiO <sub>2</sub> -30% | 1.84                                       | 0.032                                 | 1.785                      | 1.49      |
| HC300-30%                  | 1.83                                       | 0.051                                 | 2.79                       | 1.34      |
| PtCu/SiO <sub>2</sub> -40% | 3.53                                       | 0.13                                  | 3.66                       | 1.30      |
| HC300-40%                  | 4.38                                       | 0.28                                  | 6.35                       | 1.27      |
| Pt/C                       | 30.8                                       | 0.29                                  | 0.945                      | 0.93      |

**Table S3 The MOR test results of all catalysts**
